# Supplementary material for: A Molecular View of Amyotrophic Lateral Sclerosis Through the Lens of Interaction Network Modules
Source: Research Square preprint supplement (doi:10.21203/rs.3.rs-656827/v1), 2021-07-19
Supplement: Supplementary file 1 [file 35dbf8ab13720be1a16d5a9c.xlsx]

## Sheet: Sheet1
Interactions	UniProt ID	UniProt AC	Description
778	SUMO1_HUMAN	P63165	Small ubiquitin-related modifier 1
633	SUMO2_HUMAN	P61956	Small ubiquitin-related modifier 2
587	P53_HUMAN	P04637	Cellular tumor antigen p53
556	RS27A_HUMAN	P62979	Ubiquitin-40S ribosomal protein S27a
532	RL40_HUMAN	P62987	Ubiquitin-60S ribosomal protein L40
499	HDAC1_HUMAN	Q13547	Histone deacetylase 1
484	GRB2_HUMAN	P62993	Growth factor receptor-bound protein 2
454	UBC_HUMAN	P0CG48	Polyubiquitin-C
447	SUMO3_HUMAN	P55854	Small ubiquitin-related modifier 3
447	HS90A_HUMAN	P07900	Heat shock protein HSP 90-alpha
